# Supplementary material for: A facile method for the fabrication of covalently linked PAH/PSS layer-by-layer films
Source: Royal Society of Chemistry journal article supplement (doi:10.1039/c3ra45646c), 2013-11-19
Supplement: c3ra45646c.pdf [file c3ra45646c.pdf]

Supplementary Information

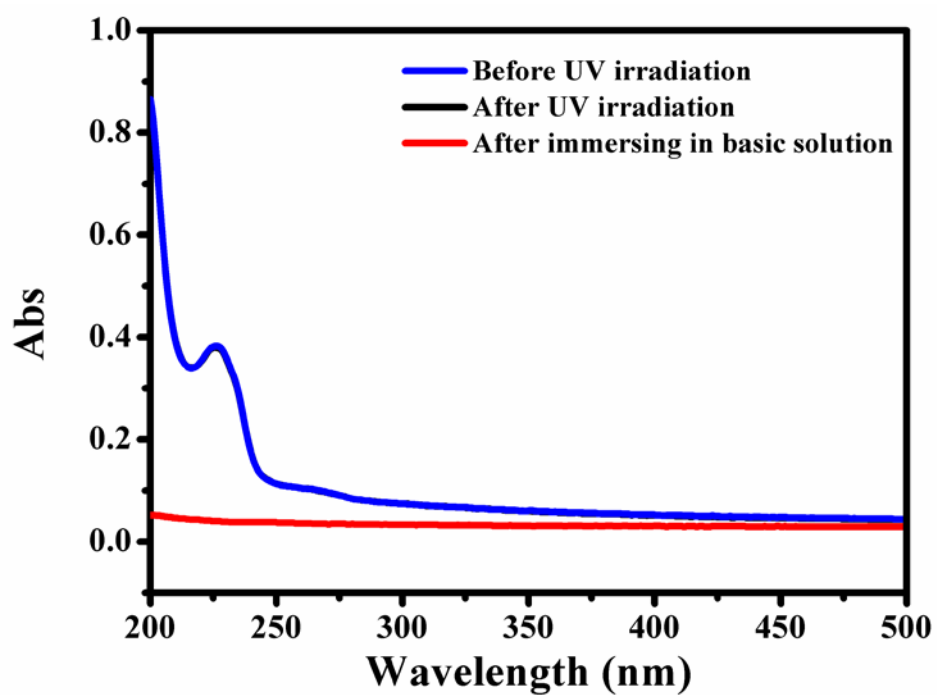

Figure S 1. UV-vis spectra for the multilayered film before (blue) and after (black) UV irradiation, and after washing in basic solution (red). The black curve was identical with the blue one, thus was invisible in the spectra.

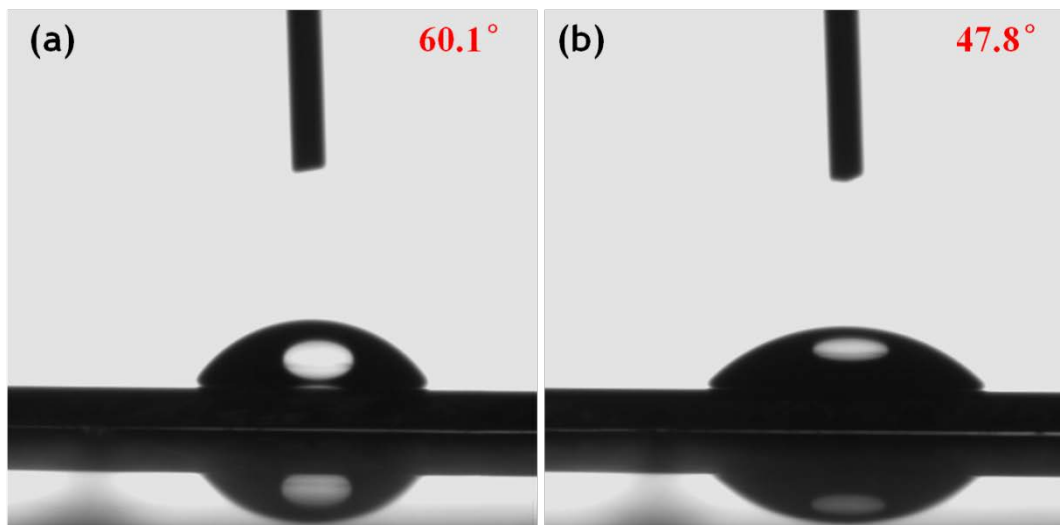

Figure S 2. Contact Angle of the multilayered film before (a) and after (b) cross-linking with DAS.
